# Supplementary material for: 1H, 13C and 15N chemical shift assignment of the stem-loop 5a from the 5′-UTR of SARS-CoV-2
Source: Biomol NMR Assign. 2021 Jan 23;15(1):203–11. doi: 10.1007/s12104-021-10007-w (PMC7822759; doi:10.1007/s12104-021-10007-w)
Supplement: Supplementary file 1 — Supplementary file1 (DOCX 20962 KB) [file 12104_2021_10007_MOESM1_ESM.docx]

**Supplementary Information: 1H, 13C and 15N chemical shift assignment of the stem-loop 5a from the 5'-UTR of SARS-CoV-2**

Robbin Schnieders2,4§, Stephen A. Peter1§, Elnaz Banijamali6, Magdalena Riad6, Nadide Altincekic2,4, Jasleen Kaur Bains2,4, Betül Ceylan2,4, Boris Fürtig2,4, J. Tassilo Grün2,4, Martin Hengesbach2,4, Katharina F. Hohmann2,4, Daniel Hymon2,4, Bozana Knezic2,4, Andreas Oxenfarth2,4, Katja Petzold6, Nusrat S. Qureshi5, Christian Richter2,4, Judith Schlagnitweit6, Andreas Schlundt3,4, Harald Schwalbe2,4,*, Elke Stirnal2,4, Alexey Sudakov2,4, Jennifer Vögele3,4 Anna Wacker2,4, Julia E. Weigand1, Julia Wirmer-Bartoschek2,4, Jens Wöhnert3,4

1Department of Biology, Technical University of Darmstadt, Schnittspahnstr. 10, 64287 Darmstadt, Germany. 2Institute for Organic Chemistry and Chemical Biology, 3Institute for Molecular Biosciences, 4Center for Biomolecular Magnetic Resonance (BMRZ), Johann Wolfgang Goethe-University Frankfurt, Max-von-Laue-Str. 7, 60438 Frankfurt/M., Germany.
5present address: EMBL Heidelberg, Meyerhofstraße 1, 69117 Heidelberg.
6Department of Medical Biochemistry and Biophysics, Karolinska Institute, Biomedicum, Solnavägen 9, 17177 Stockholm, Sweden

*to whom correspondence should be addressed: [covid19-nmr@dlist.server.uni-frankfurt.de](mailto:covid19-nmr@dlist.server.uni-frankfurt.de) , Schwalbe@nmr.uni-frankfurt.de

§ equal contribution

**Suppl. Table 1**: 2hJNN coupling constants for the base pairs in SL5a. The coupling constants were derived at 283 K from 2D BEST-TROSY-HNN-COSY spectra.

| **base pair** | **2hJNN coupling constant** |
| --- | --- |
| G188-C218 | 5.9 Hz |
| G189-C217 | 6.1 Hz |
| C190-G216 | 6.0 Hz |
| U191-A215 | 6.4 Hz |
| G192-C214 | 5.9 Hz |
| C193-G213 | 6.0 Hz |
| A196-U209 | 6.4 Hz |
| G198-C207 | 6.1 Hz |

**Suppl. Figure 1**: **A** Secondary structure of SCoV-2 SL5 with the Nsp1 coding region highlighted in orange. **B** Secondary structure of the 14 nt RNA with 5’-cUUCGg-3’ tetraloop (Fürtig et al. 2004; Nozinovic et al. 2010).


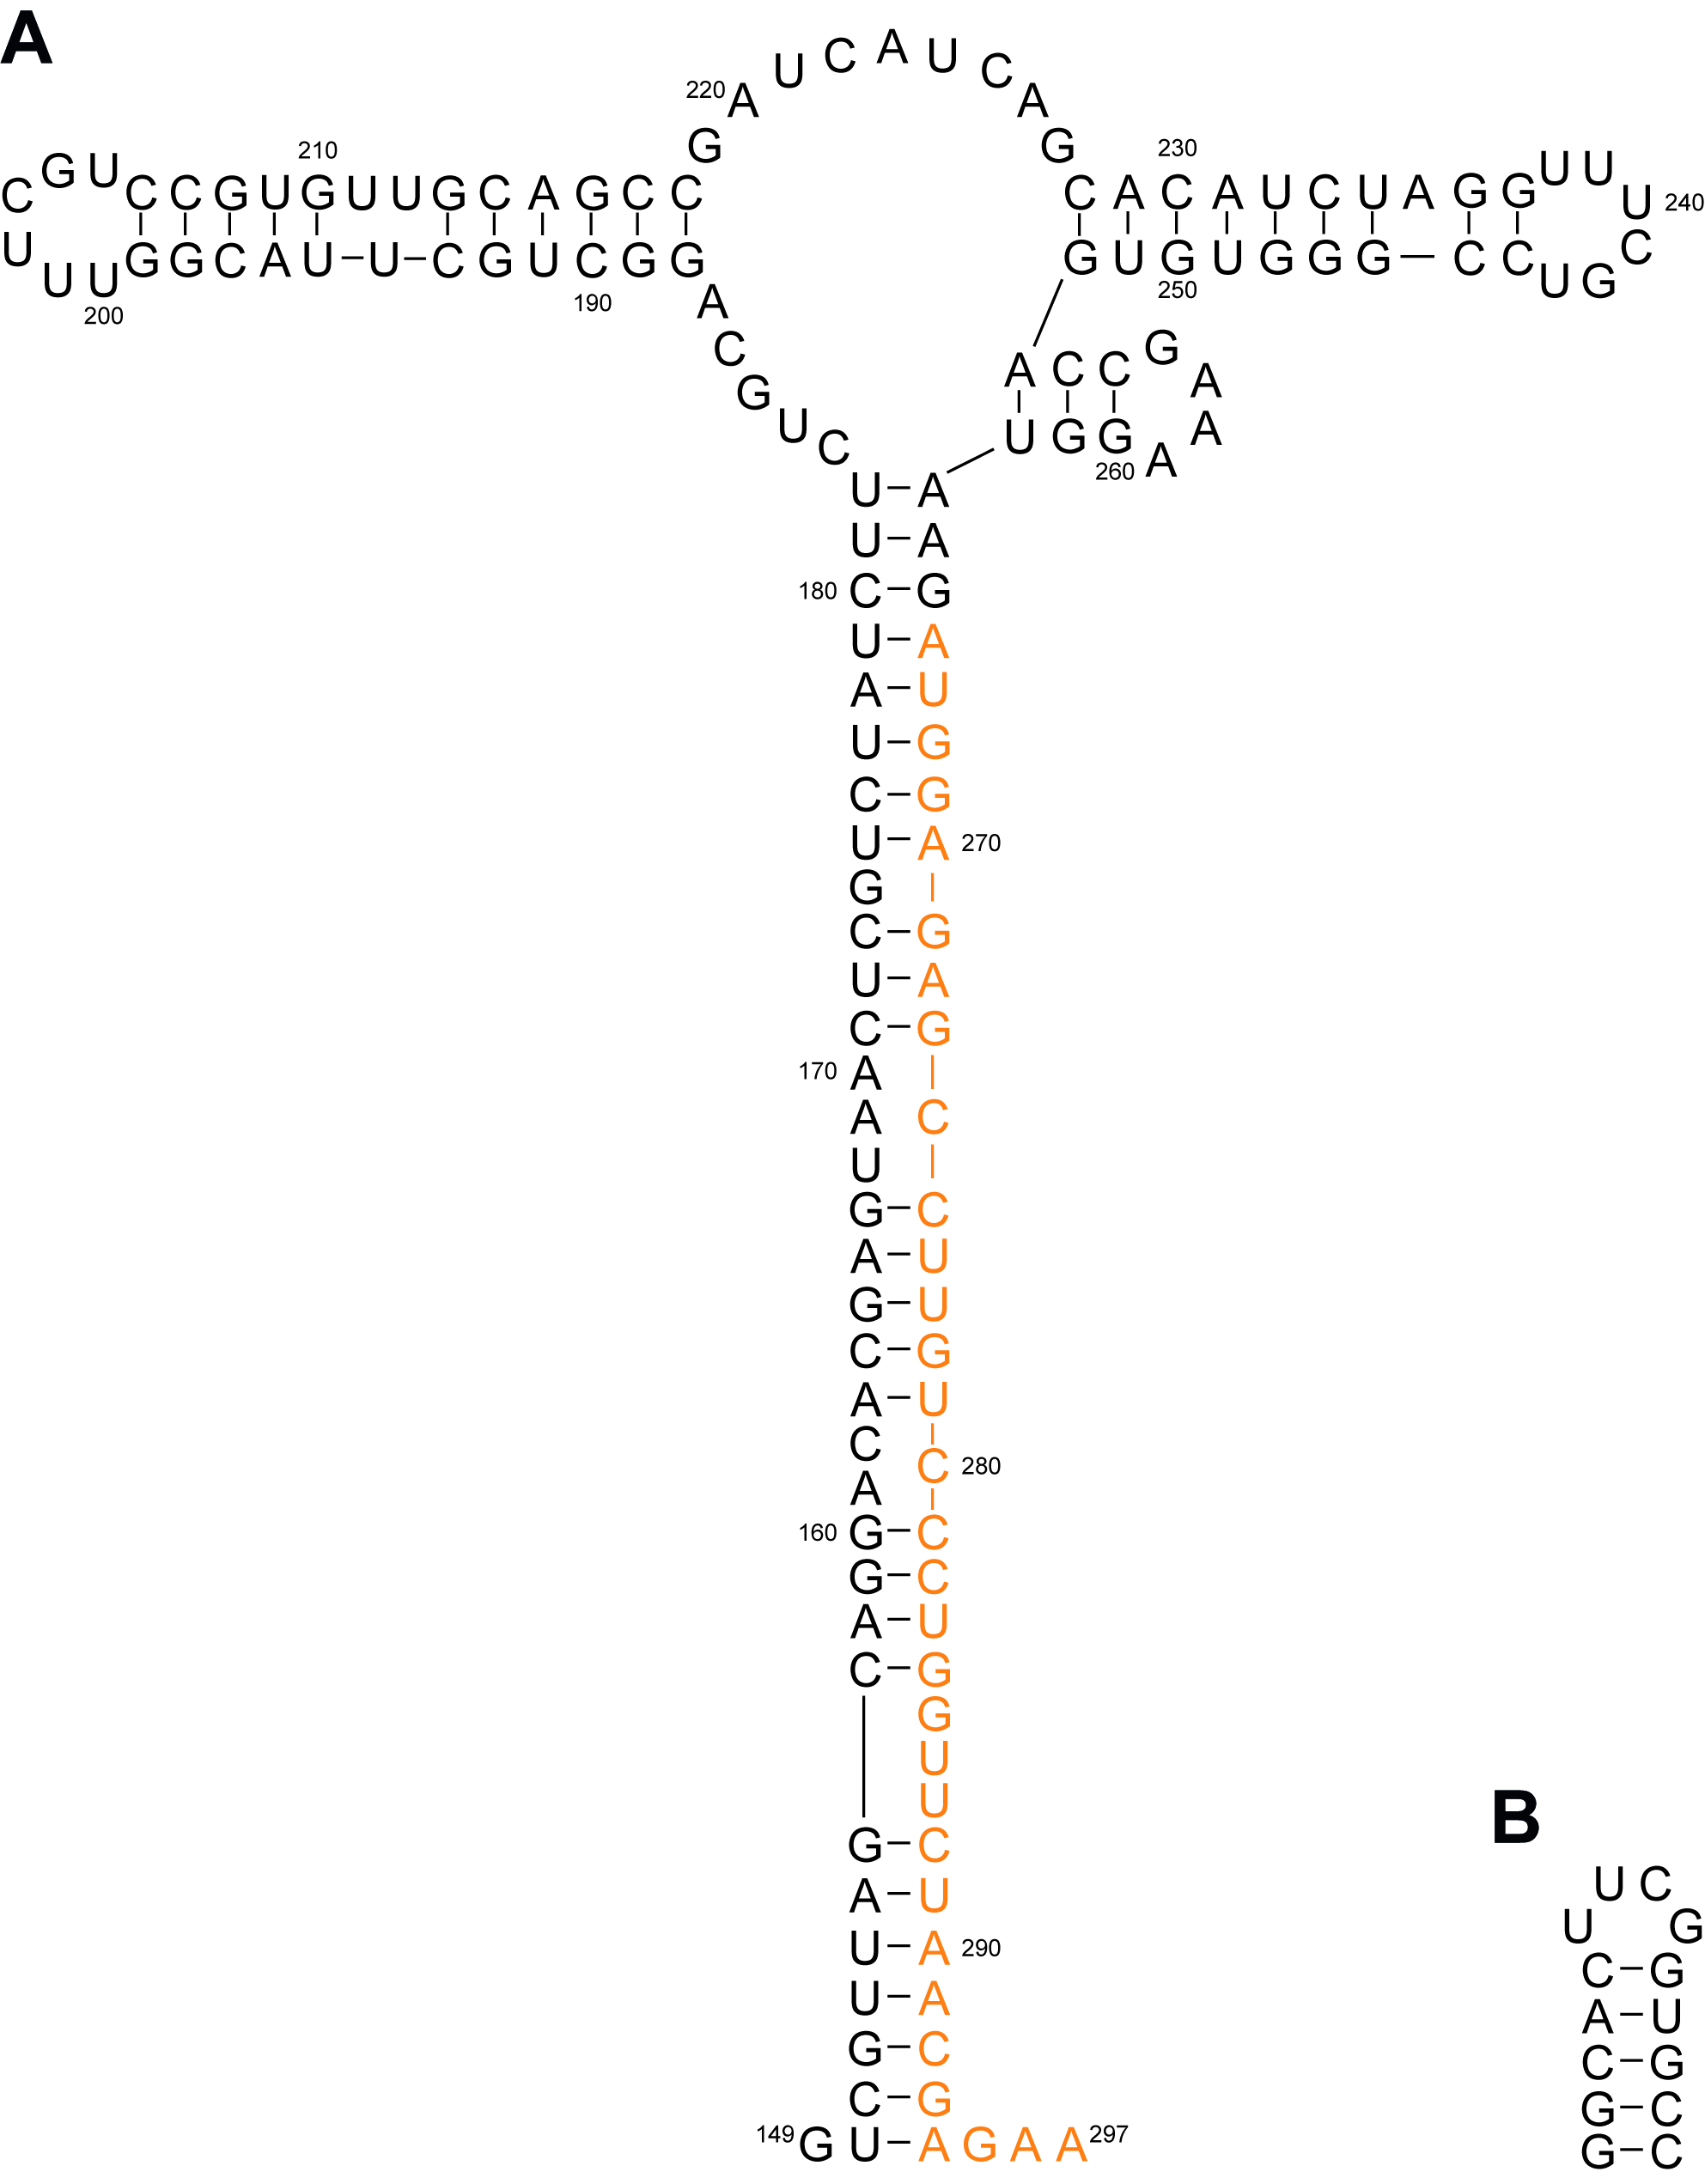


**References**

Fürtig B, Richter C, Bermel W, Schwalbe H (2004) New NMR experiments for RNA nucleobase resonance assignment and chemical shift analysis of an RNA UUCG tetraloop. J Biomol NMR 28:69–79 . https://doi.org/10.1023/B:JNMR.0000012863.63522.1f

Nozinovic S, Fürtig B, Jonker HRA, Richter C, Schwalbe H (2010) High-resolution NMR structure of an RNA model system: the 14-mer cUUCGg tetraloop hairpin RNA. Nucleic Acids Res 38:683–94 . https://doi.org/10.1093/nar/gkp956
